# Supplementary material for: Flexible all-solid-state fiber-shaped Ni–Fe batteries with high electrochemical performance
Source: Royal Society of Chemistry journal article supplement (doi:10.1039/c8ta09822k), 2018-11-23
Supplement: c8ta09822k1.pdf [file c8ta09822k1.pdf]

**Supporting Information**

**Flexible All-Solid-State Fiber-Shaped Ni-Fe Batteries with High Electrochemical  
Performance**

Qiulong Li <sup>+</sup>, Qichong Zhang<sup>+</sup>, Chenglong Liu<sup>+</sup>, Juan Sun, Jiabin Guo, Jun Zhang,  
Zhenyu Zhou, Bing He, Zhenghui Pan, Yagang Yao \*

## Materials

Cobalt nitrate hexahydrate ( $\text{Co}(\text{NO}_3)_2 \cdot 6\text{H}_2\text{O}$ , 98.5%), iron chloride hexahydrate ( $\text{FeCl}_3 \cdot 6\text{H}_2\text{O}$ , 99%), terephthalic acid ( $\text{C}_8\text{H}_6\text{O}_4$ , 99%), and PVA ( $[\text{CH}_2\text{CH}(\text{OH})]_n$ ,  $n = 1799$ ) were purchased from Aladdin. Dimethyl formamide (DMF,  $\text{C}_3\text{H}_7\text{NO}$ , 99.5%), sodium hypophosphite ( $\text{NaH}_2\text{PO}_2 \cdot \text{H}_2\text{O}$ , 98%), ammonium fluoride ( $\text{NH}_4\text{F}$ , 96%), urea ( $\text{CO}(\text{NH}_2)_2$ , 99%), nickel sulfate hexahydrate ( $\text{NiSO}_4 \cdot 6\text{H}_2\text{O}$ , 98.5%), potassium persulfate ( $\text{K}_2\text{S}_2\text{O}_8$ , 99.5%), ammonia water ( $\text{NH}_3 \cdot \text{H}_2\text{O}$ , 28%), and potassium hydroxide (KOH, 85%) were obtained from Sinopharm Chemical Reagent, China. Each of these chemicals was used directly without any further purification. Carbon nanotube fibers (CNTFs) were fabricated with a floating catalyst chemical vapor deposition method followed by shrinking with ethanol.

## Materials characterization

The morphology of the as-prepared samples was characterized by utilizing a scanning electron microscope (SEM) (Hitachi S-4800, 5 kV). The microstructure of the samples was observed by the transmission electron microscope (TEM) (Tecnai G2 F20 S-Twin) and the high-resolution TEM images were recorded on an FEI Tecnai G2 20 high-resolution transmission electron microscope at an acceleration voltage of 200 kV. The chemical composition of the samples was analyzed on an ESCALab MKII X-ray photoelectron spectrometer (XPS) with nonmonochromatized Mg  $\text{K}\alpha$  X-rays as the excitation source. X-ray diffraction (XRD) patterns were acquired with a Rigaku D/MAX2500 V with Cu  $\text{K}\alpha$  radiation ( $\lambda = 1.5418 \text{ \AA}$ ).

## Electrochemical Performance Measurements

The electrochemical performance of the fabricated samples was evaluated by galvanostatic charge/discharge (GCD), cyclic voltammetry (CV), and electrochemical impedance spectroscopy (EIS) measurements on an electrochemical workstation (CHI 760E, Chenhua) using a three-electrode configuration in 3 M KOH aqueous solution. The fabricated electrode materials, Pt wire and Ag/AgCl were used as the working, counter and reference electrodes, respectively. The EIS measurements were assumed between  $10^{-2}$ - $10^5$  Hz with a voltage amplitude of 5 mV and open-circuit potential. The capacity (C), energy density (E), and power density (P) were calculated according to the following equations:

$$C_A = \frac{1}{3600} \frac{I \Delta t}{A} \quad (1)$$

$$E_A = C_A * V_p \quad (2)$$

$$P_A = \frac{E_A}{\Delta t} \quad (3)$$

$$C_V = \frac{1}{3600} \frac{I \Delta t}{V} \quad (4)$$

$$E_V = C_V * V_p \quad (5)$$

$$P_V = \frac{E_V}{\Delta t} \quad (6)$$

Where A and V are the total area and volume of the as-assembled fiber-shaped energy storage devices (FESDs), respectively. I,  $\Delta t$  and  $V_p$  are the discharge current, discharge time, and voltage platform. The cycle life tests were conducted with GCD measurements with a constant current density of 30 mA/cm<sup>2</sup> for 3,000 cycles.

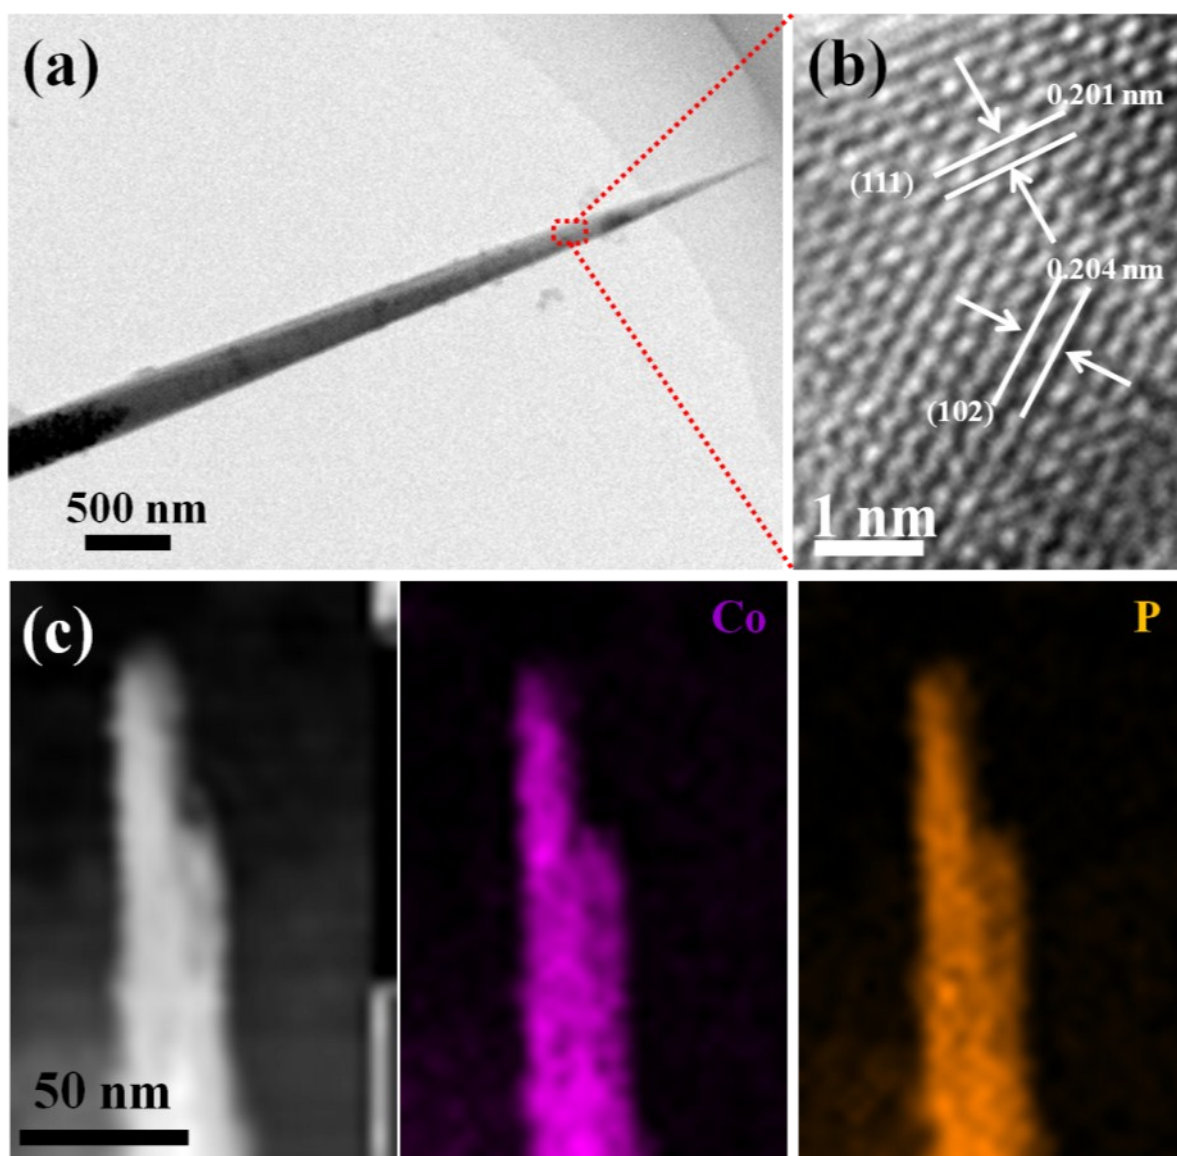

**Figure S1** (a) Low-magnification TEM image of single CoP nanowire. (b) High-magnification of the red rectangle in panel a. (c) TEM image of the CoP nanowire and the corresponding EDS element mapping images.

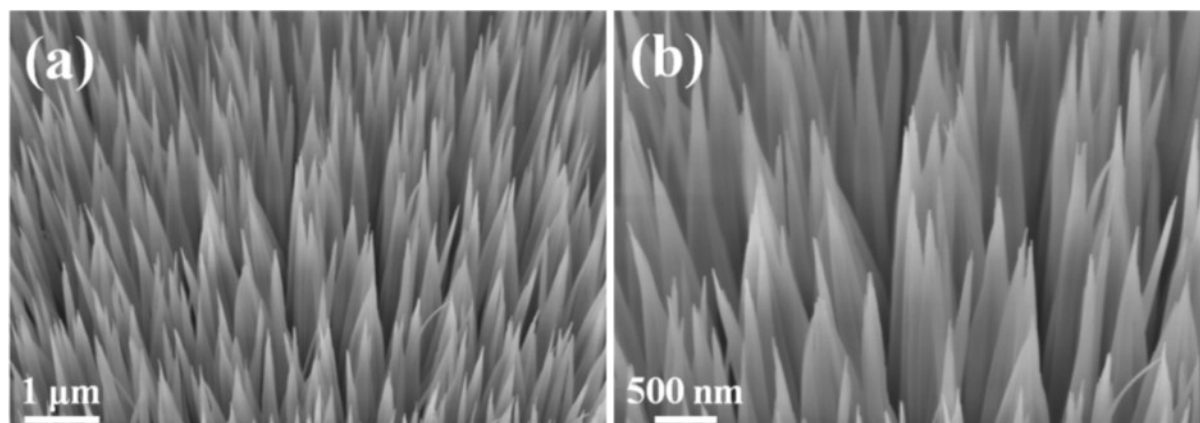

**Figure S2** (a) and (b) SEM images of the  $\text{Co}_3\text{O}_4$  NWAs/CNTF at different magnifications.

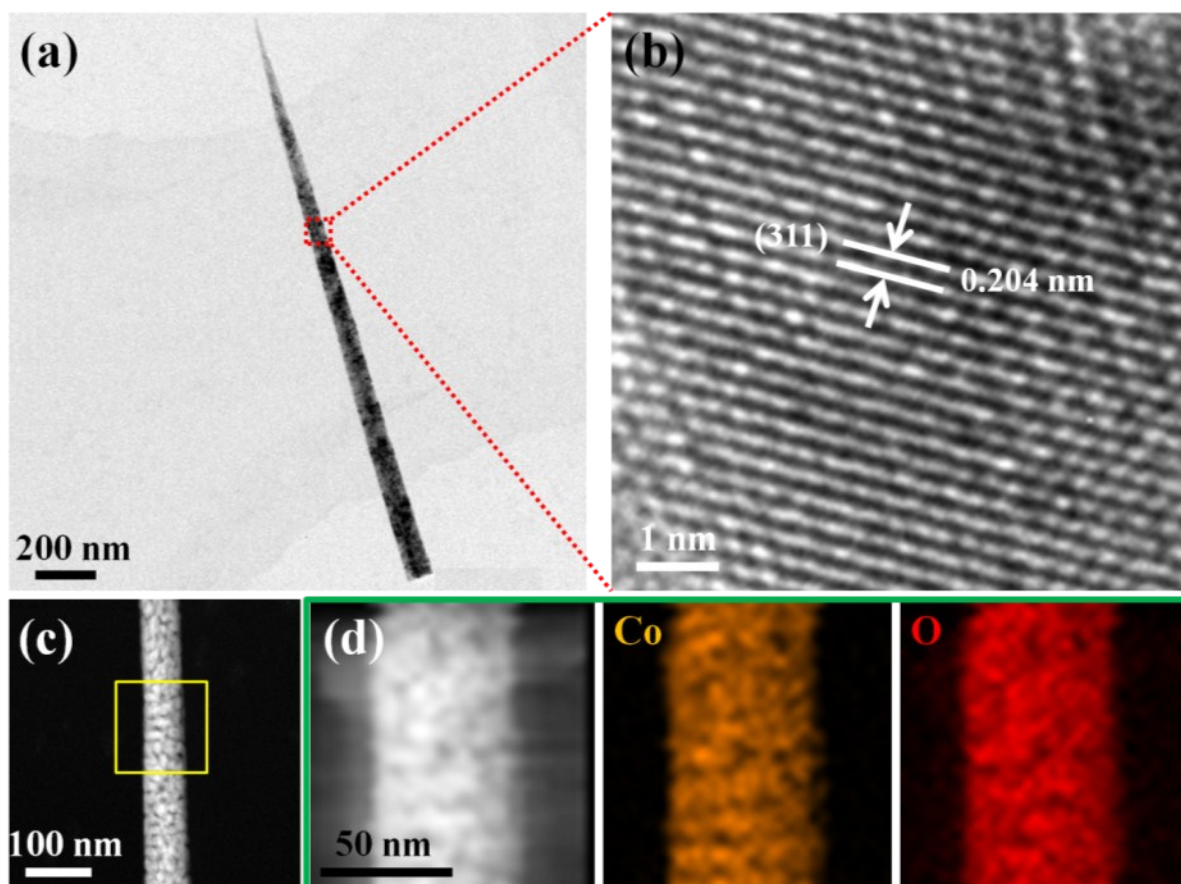

**Figure S3** (a) Low-magnification TEM image of single  $\text{Co}_3\text{O}_4$  nanowire. (b) High-magnification of the red rectangle in panel a. (c) TEM image of partially single  $\text{Co}_3\text{O}_4$  nanowire. (d) TEM image and corresponding EDS element mapping images of the yellow rectangle in panel c.

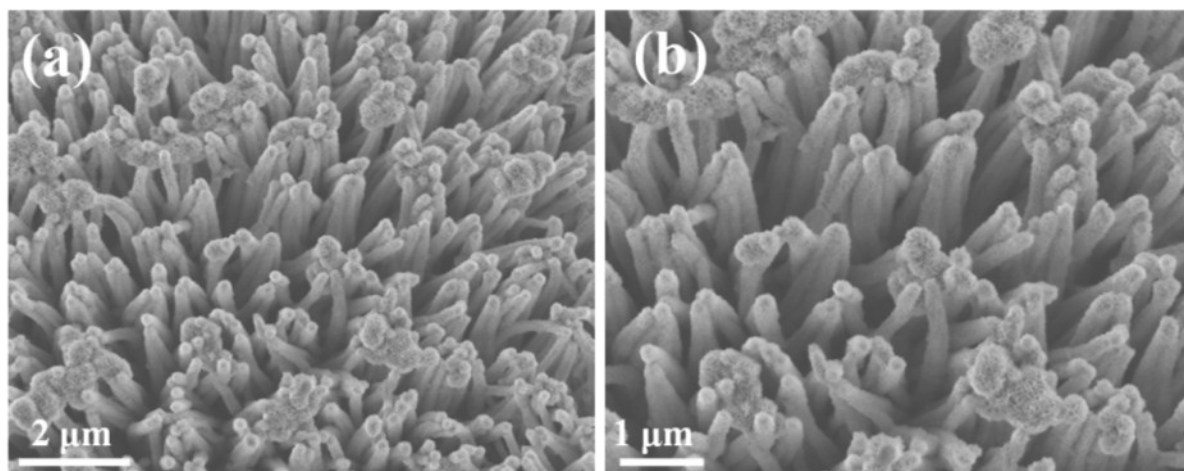

**Figure S4** (a) and (b) SEM images of the  $\text{Co}_3\text{O}_4@\text{Ni}(\text{OH})_2$  NWAs/CNTF at different magnifications.

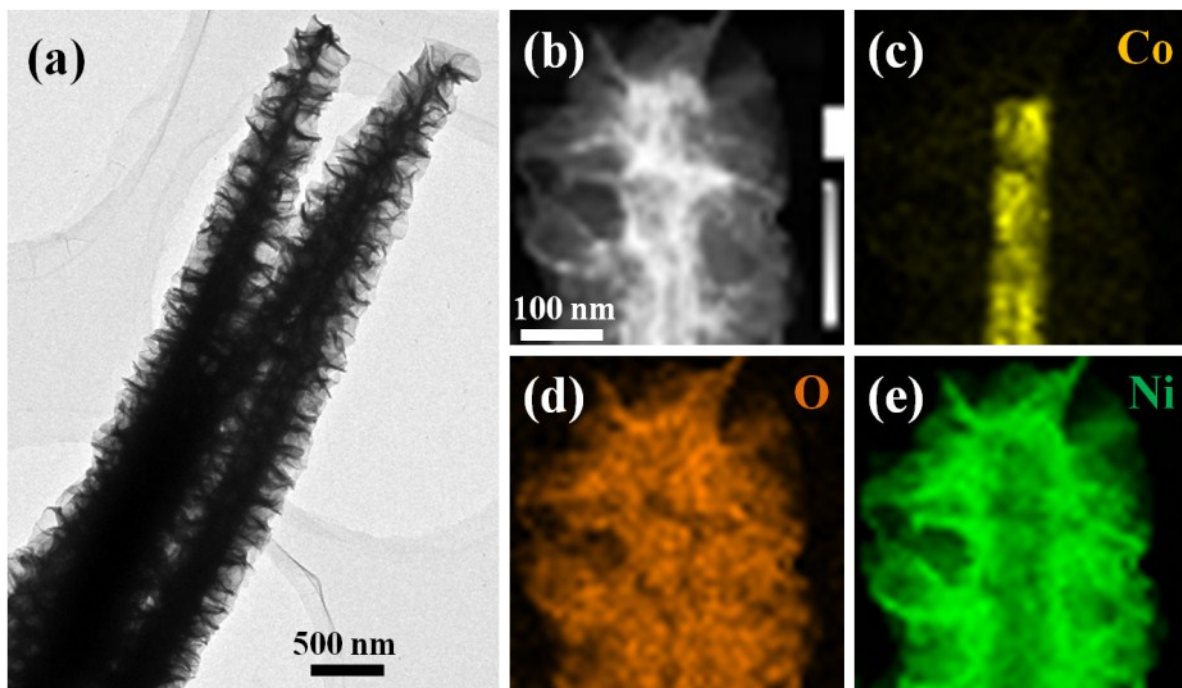

**Figure S5** (a) Low-magnification TEM image of  $\text{Co}_3\text{O}_4@@\text{Ni}(\text{OH})_2$  NWAs. (b) STEM bright field image of  $\text{Co}_3\text{O}_4@@\text{Ni}(\text{OH})_2$  NWAs. Elemental mapping of (c) Co, (d) O, and (e) Ni.



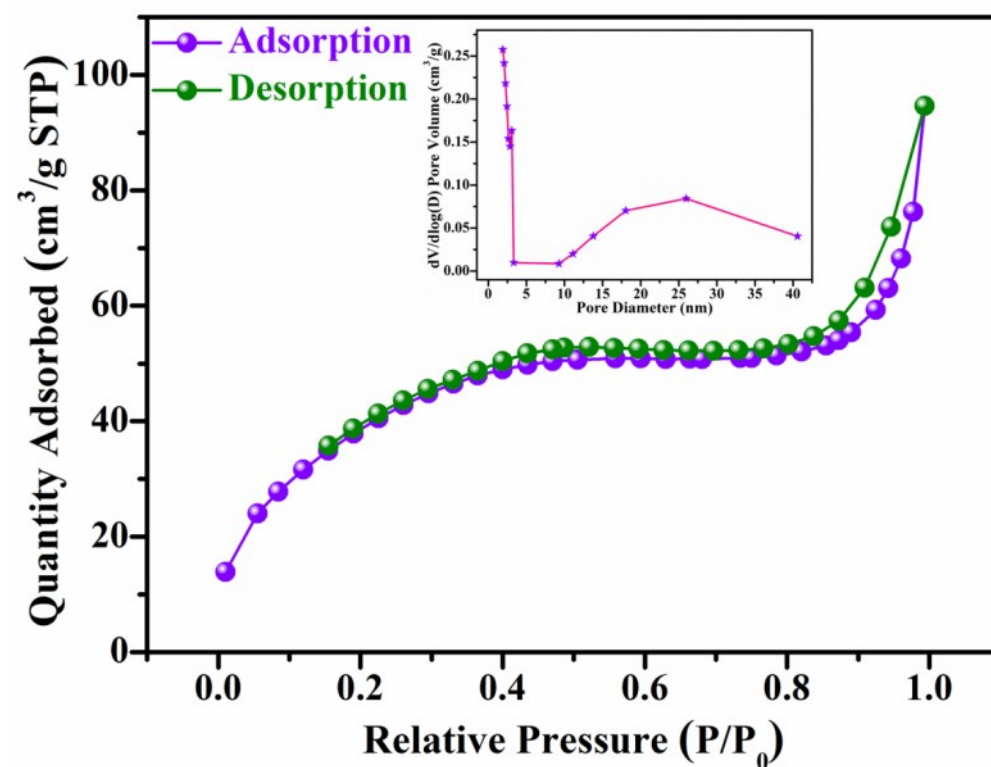

**Figure S6** N<sub>2</sub> absorption-desorption isotherm of the CoP@Ni(OH)<sub>2</sub> NWAs/CNTF cathode material (Inset: BJH desorption pore distribution).

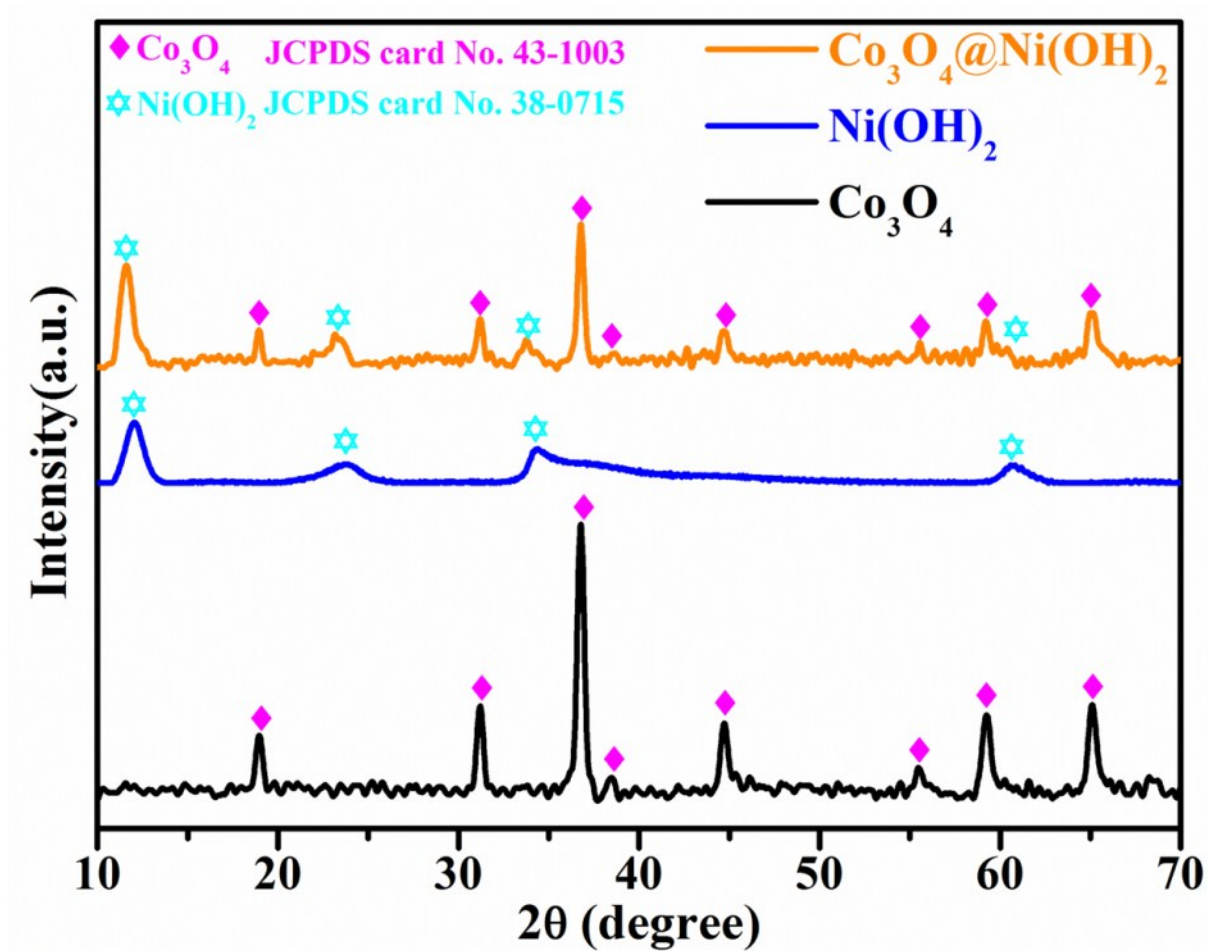

**Figure S7** XRD patterns of  $\text{Co}_3\text{O}_4@\text{Ni}(\text{OH})_2$  NWAs,  $\text{Ni}(\text{OH})_2$  nanosheets and  $\text{Co}_3\text{O}_4$  NWAs.

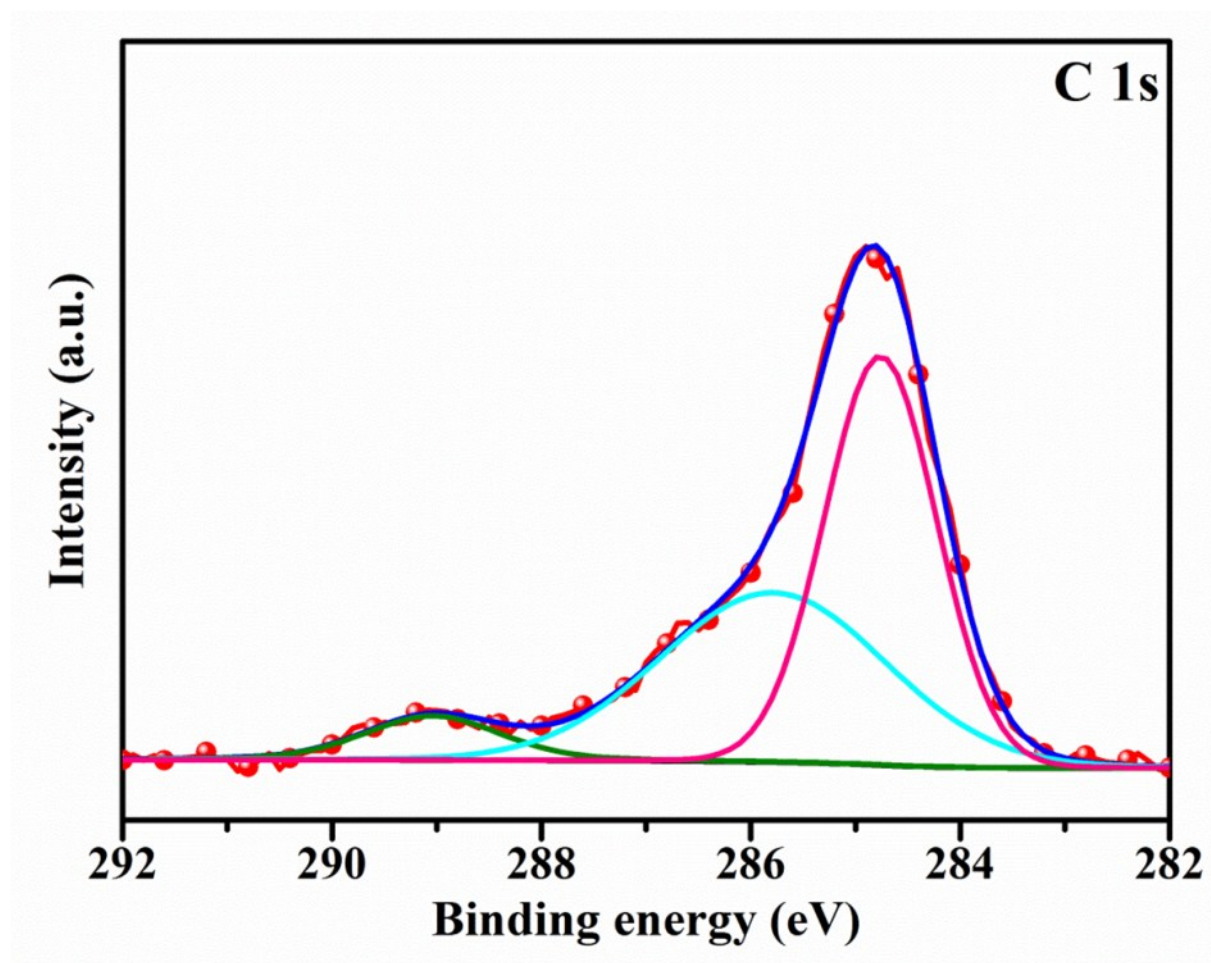

**Figure S8** High-resolution C 1s XPS spectra of the CoP@Ni(OH)<sub>2</sub> NWAs/CNTF.

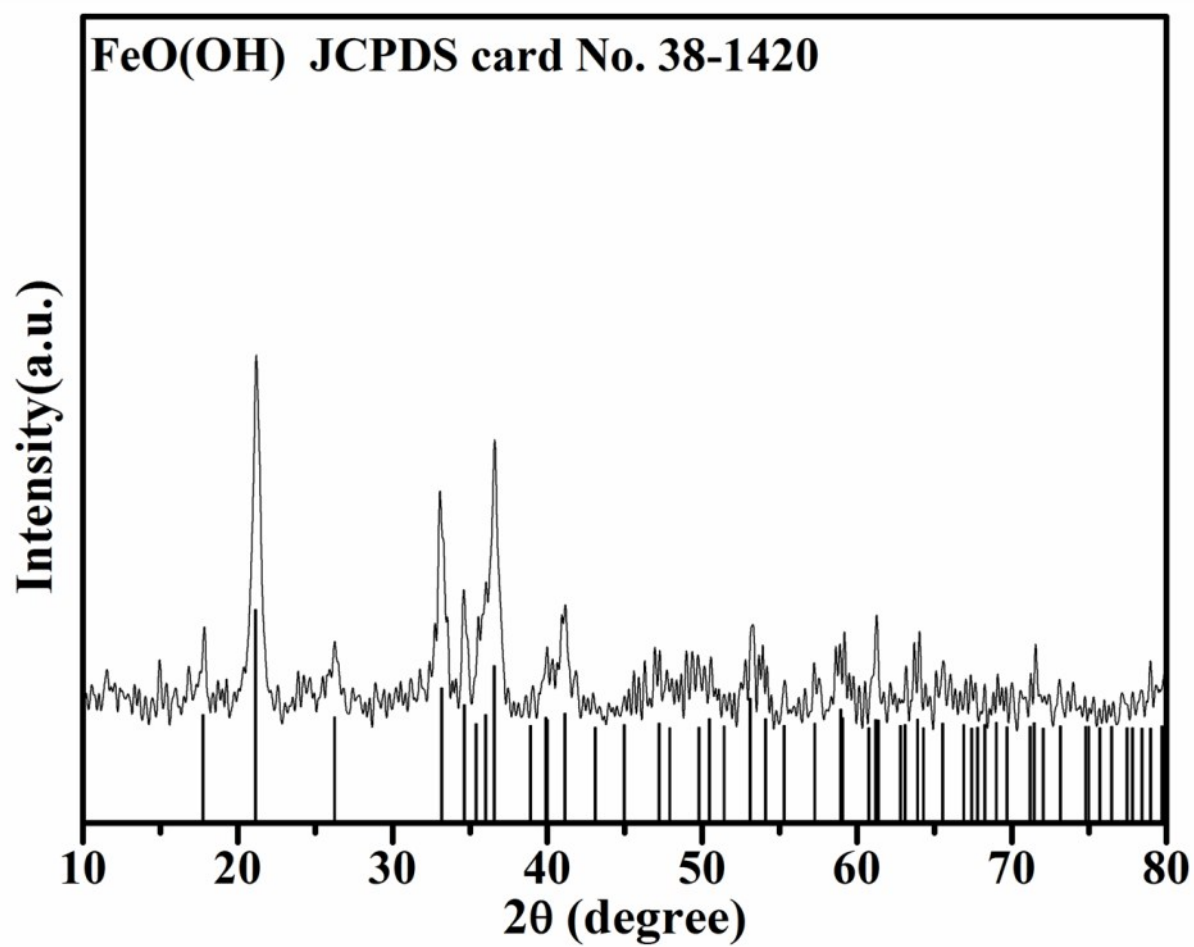

**Figure S9** XRD spectra of FeO(OH).

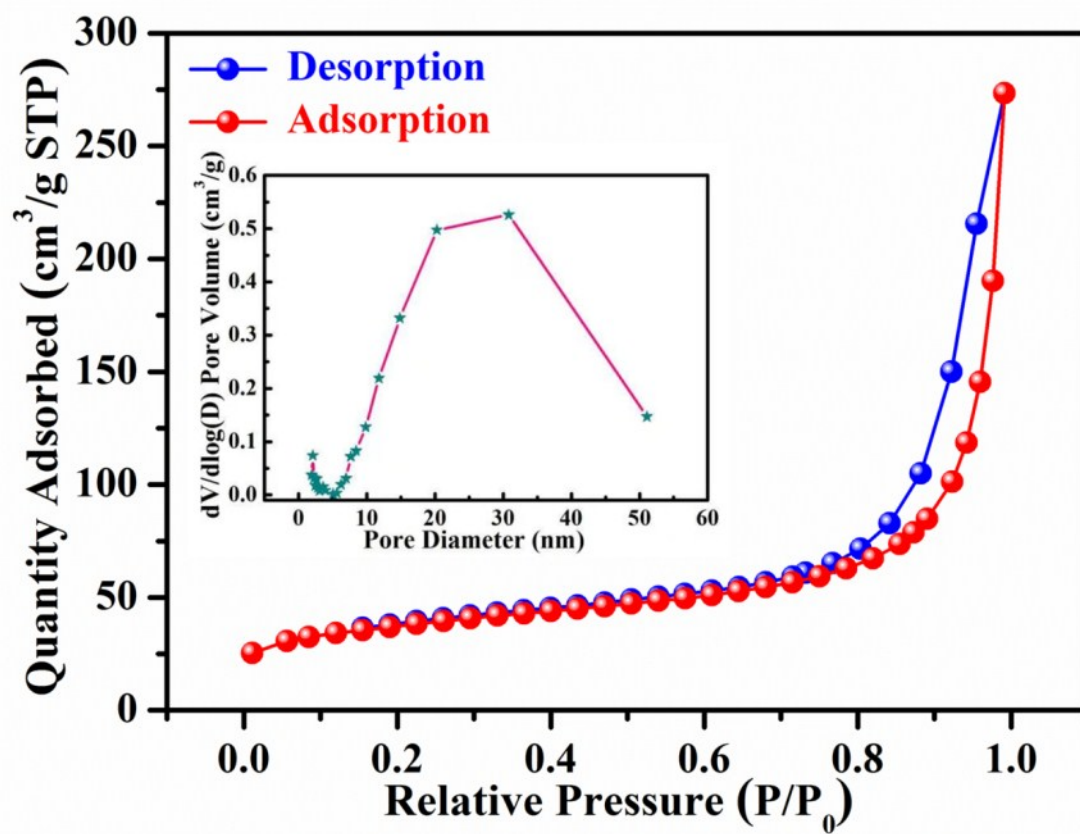

**Figure S10** N<sub>2</sub> absorption-desorption isotherm of the S- $\alpha$ -Fe<sub>2</sub>O<sub>3</sub> anode material (Inset: BJH desorption pore distribution).

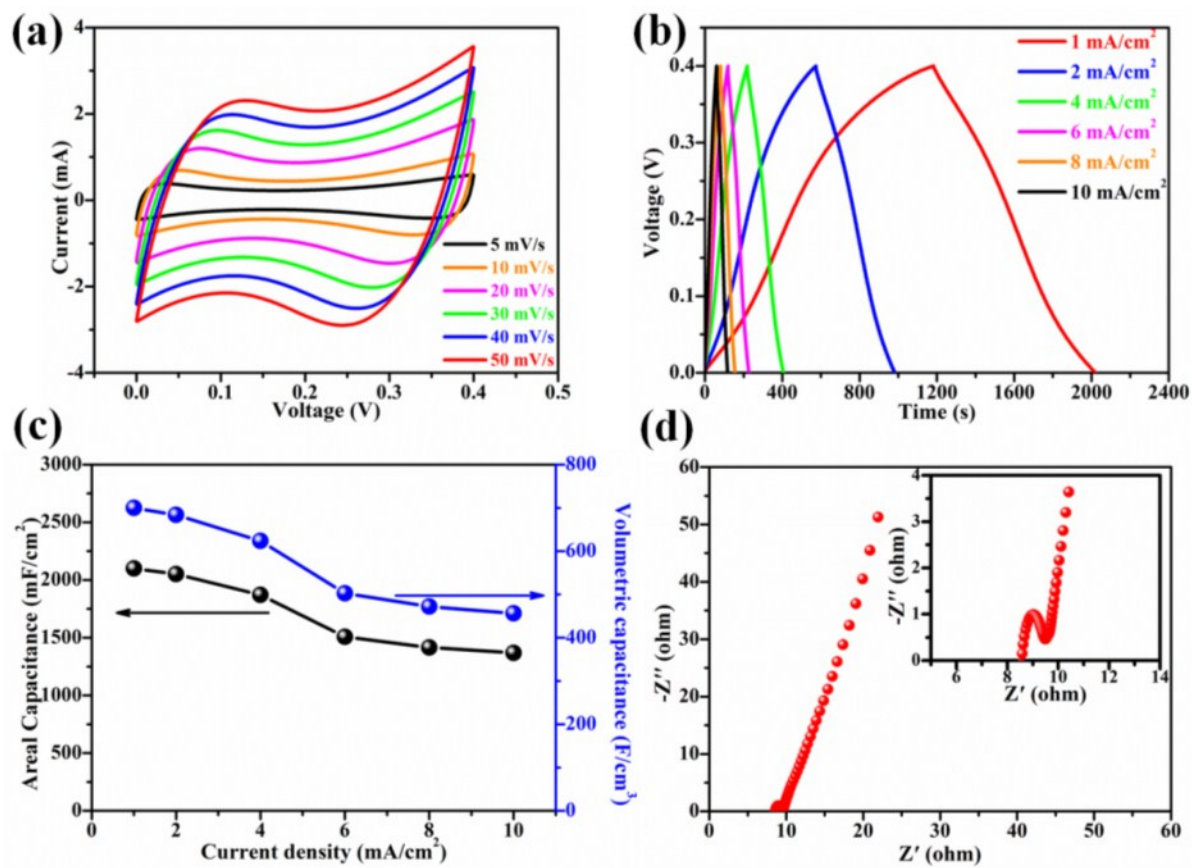

**Figure S11** (a) CV curves and (b) GCD curves of the  $\text{Co}_3\text{O}_4$  NWAs/CNTF electrode.

(c) Specific capacitance and (d) EIS results of the  $\text{Co}_3\text{O}_4$  NWAs/CNTF electrode.

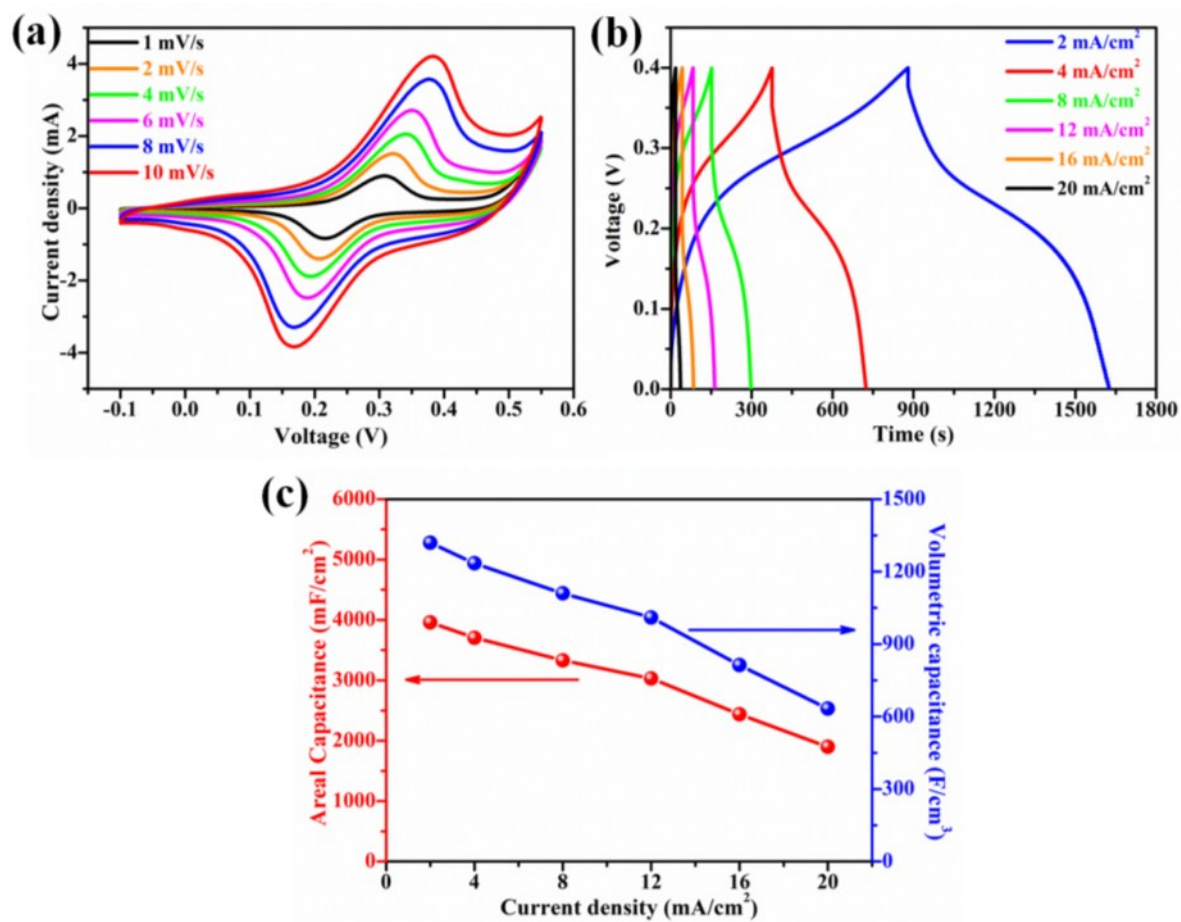

**Figure S12** (a) CV curves, (b) GCD curves and (c) specific capacitance of the  $\text{Co}_3\text{O}_4@\text{Ni}(\text{OH})_2$  NWAs/CNTF electrode.



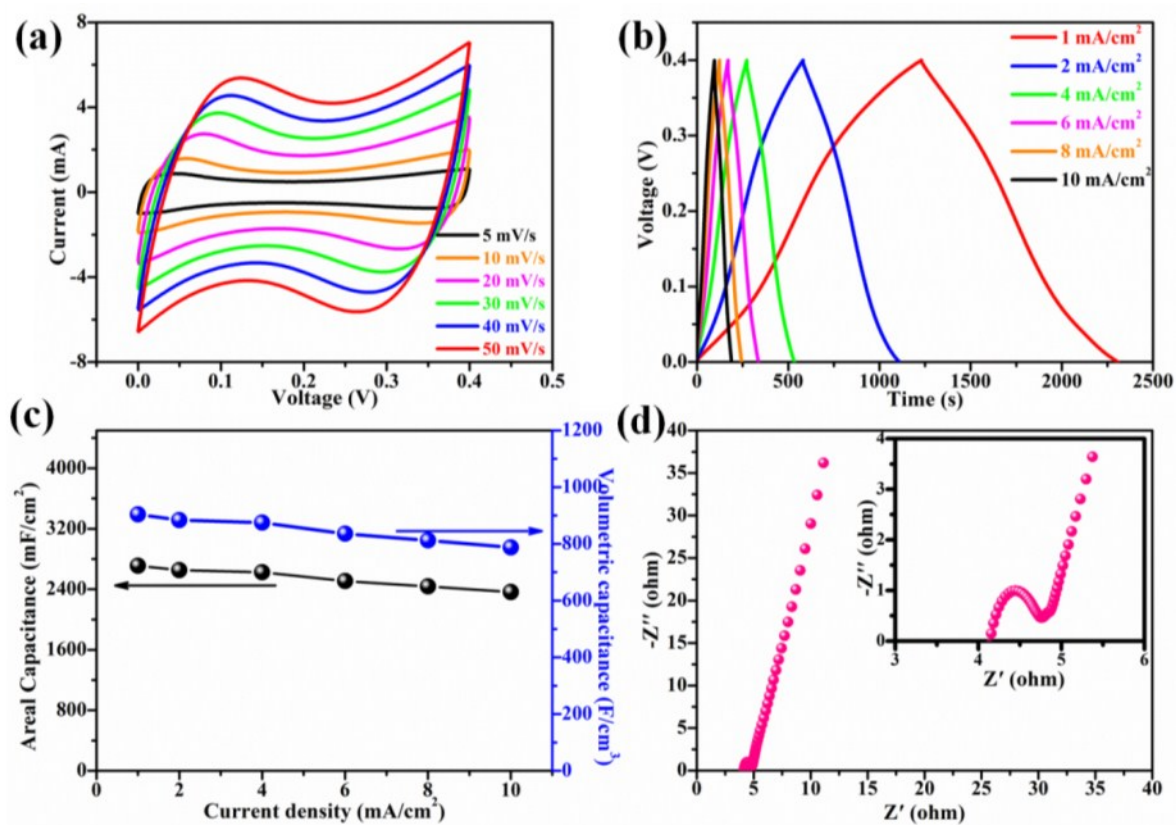

**Figure S13** (a) CV curves and (b) GCD curves of the CoP NWAs/CNTF electrode. (c) Specific capacitance and (d) EIS results of the CoP NWAs/CNTF electrode.



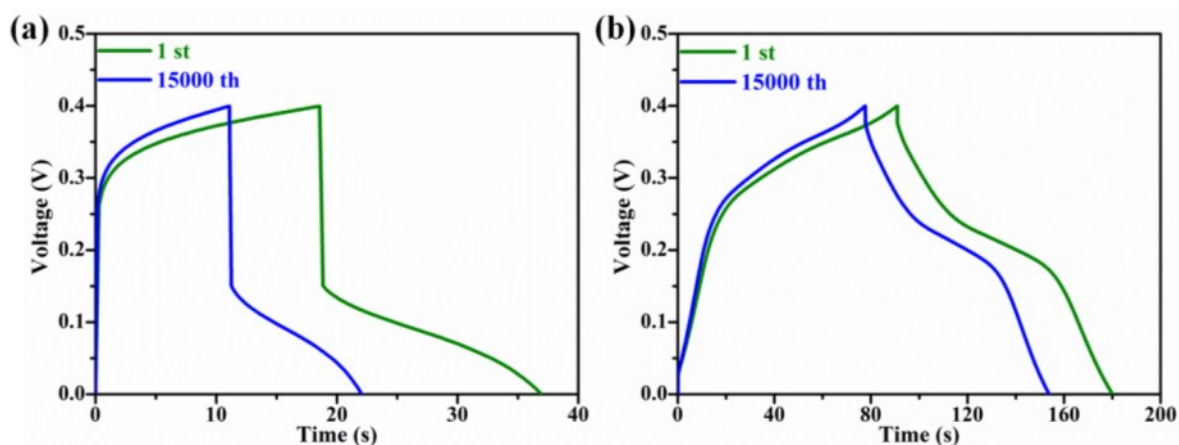

**Figure S14** GCD curves for the 1st and 15,000th cycles of (a)  $\text{Co}_3\text{O}_4@\text{Ni}(\text{OH})_2$  NWAs/CNTF electrode and (b)  $\text{CoP}@\text{Ni}(\text{OH})_2$  NWAs/CNTF electrode at  $20 \text{ mA/cm}^2$ .

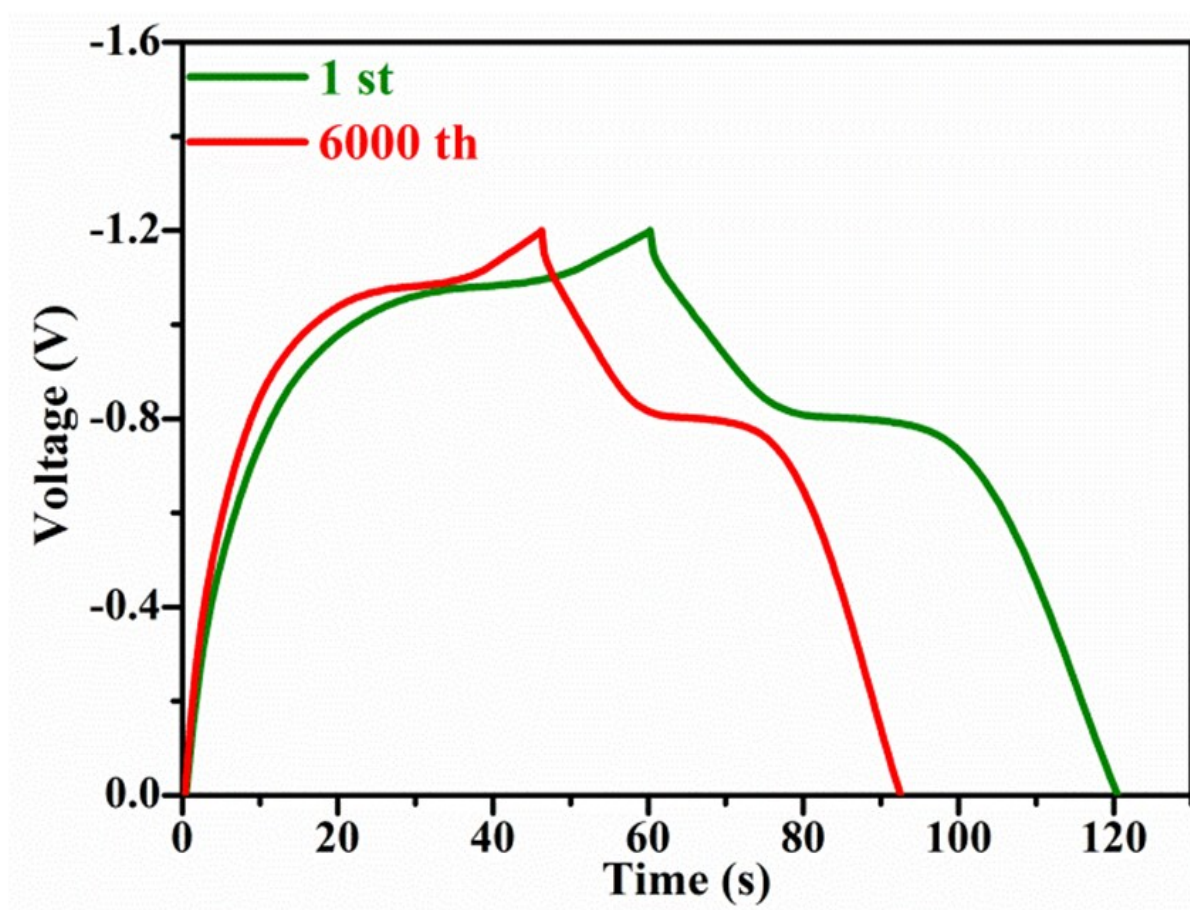

**Figure S15** GCD curves for the 1st and 6,000th cycles of the  $\text{S-}\alpha\text{-Fe}_2\text{O}_3/\text{CNTF}$  electrode.

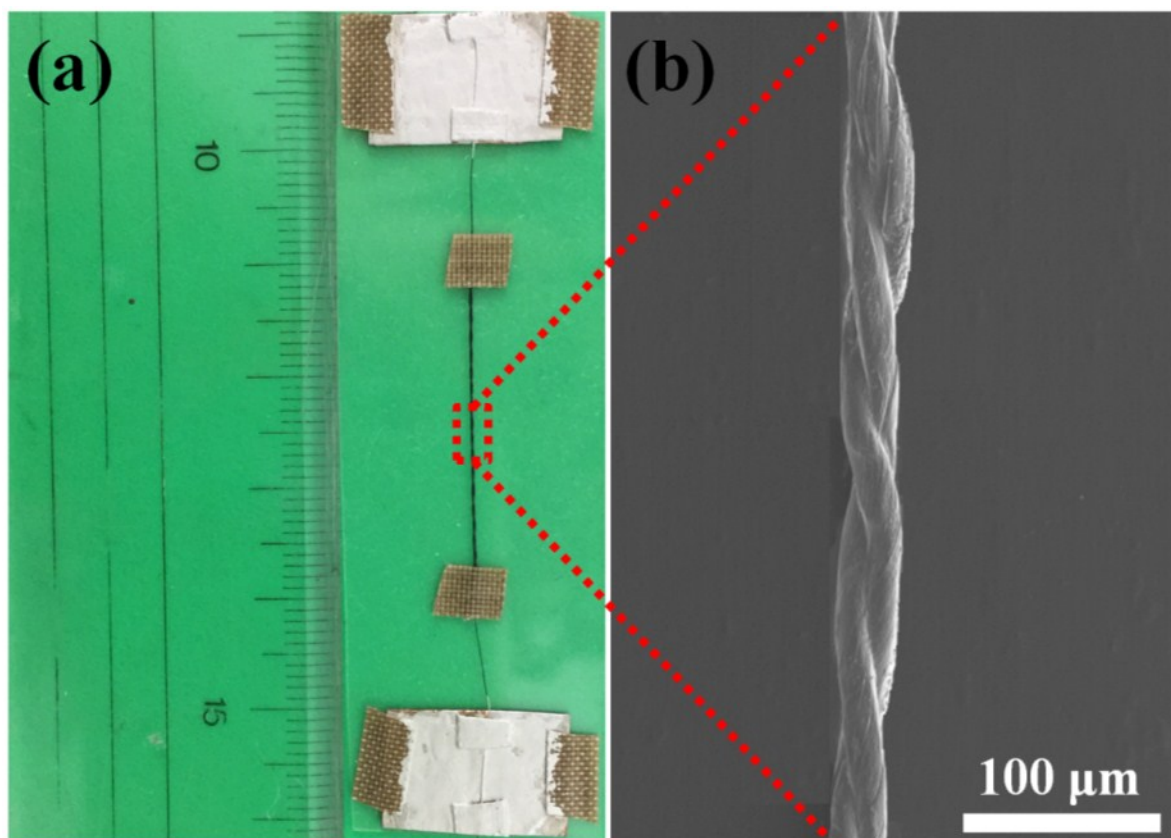

**Figure S16** (a) Optical image and (b) SEM image of the as-assembled FESD with twisted structure.

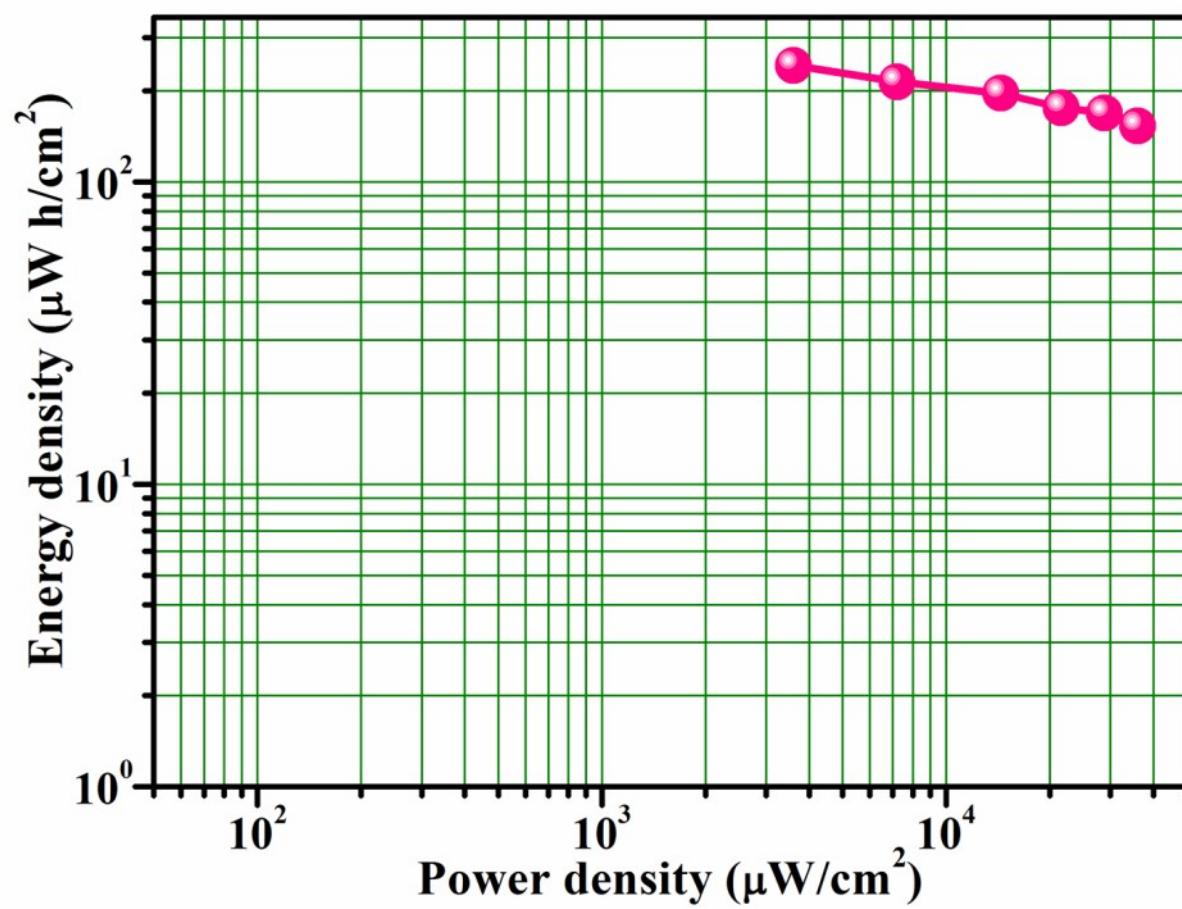

**Figure S17** Areal energy and power densities of our as-assembled FESD.

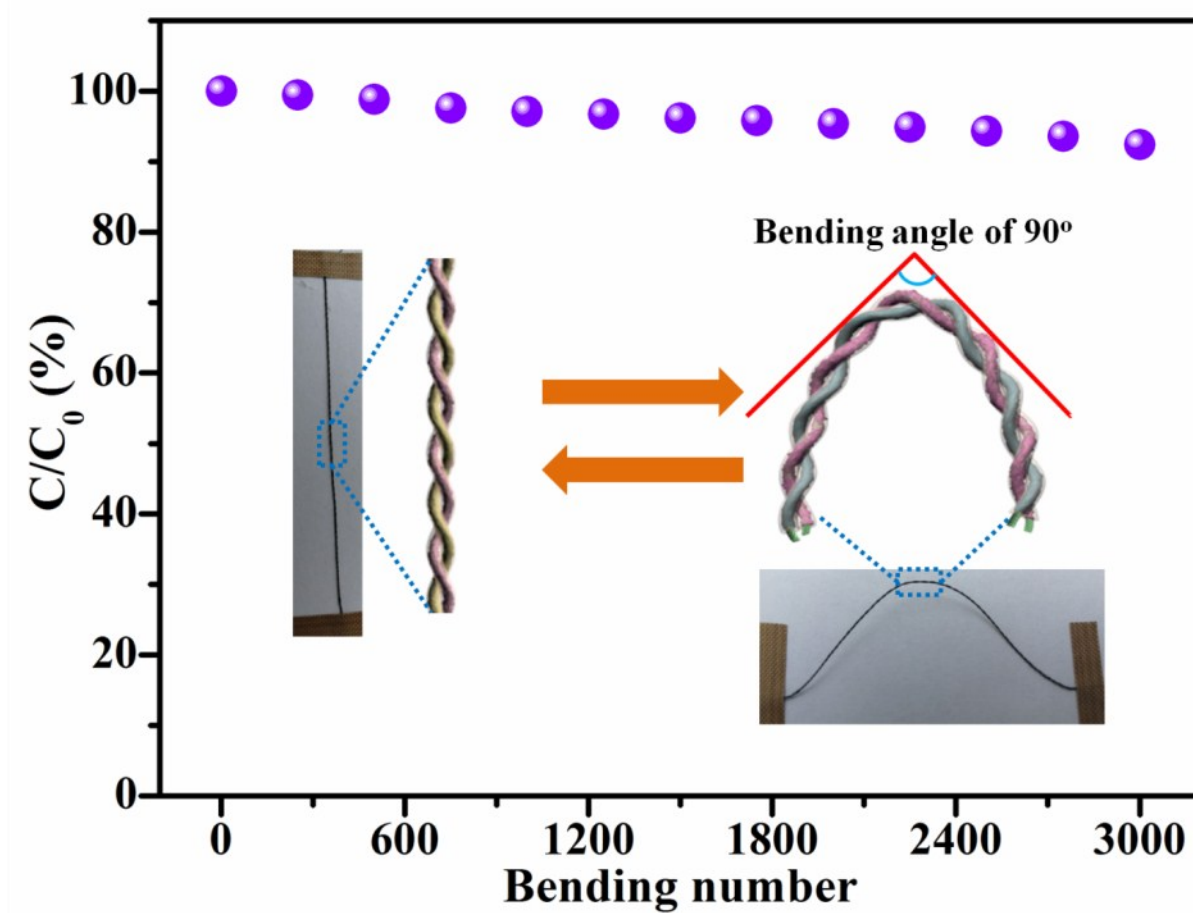

**Figure S18** Normalized capacity of the as-assembled FESD bent 90° for 3000 cycles.

$C_0$  is the initial capacity and  $C$  is the capacity at the indicated number of bending number.

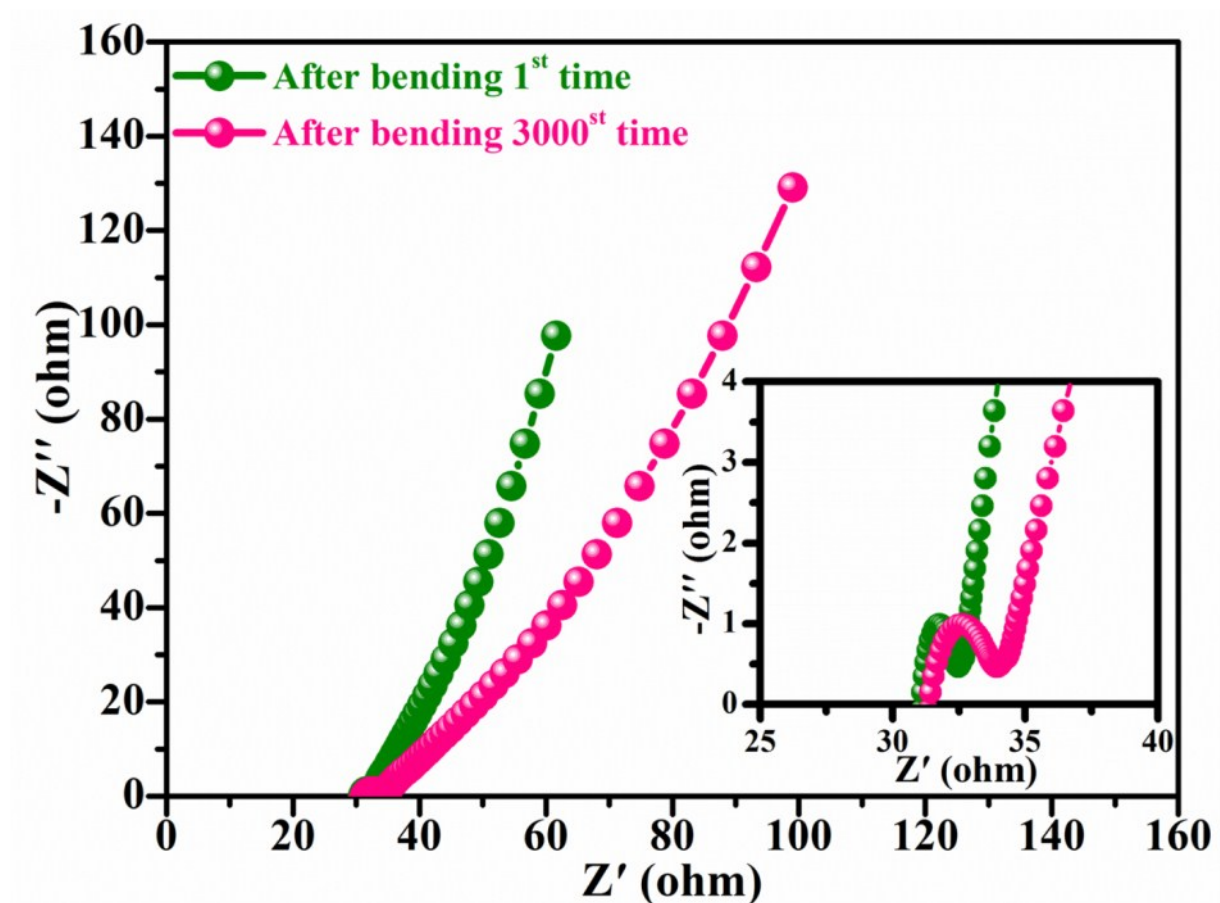

**Figure S19** Nyquist plot of the as-assembled FESD at frequencies ranging from 10-2 to 105 Hz with a voltage amplitude of 5 mV at open-circuit potential after bending 1st and 3,000th times.

After the 1st and 3000th bending number, the equivalent series resistance values of our FESD are 31.5  $\Omega$  and 32.8  $\Omega$ , demonstrating the improvements of the ionic resistance of the electrolyte and the resistance of the electrode material after the bending number. Furthermore, the semicircle diameter related to charge transfer resistance also increases after 3000 bending numbers.
